# Supplementary material for: An introduction to thermodynamic integration and application to dynamic causal models
Source: Springer Nature journal article supplement (doi:10.1007/s11571-021-09696-9), 2021-07-24
Supplement: MOESM1 [file 19390342]

# 1 An introduction to thermodynamic 2 integration and application to dynamic 3 causal models – Supplementary material

## 4 5 S1 A primer on Dynamic Causal Models

6 In this section, we provide a short introduction to dynamic causal modelling (DCM). Since  
7 the examples in the main text focus on fMRI data, and we limit our discussion to DCM for  
8 fMRI (Friston, Harrison, & Penny, 2003; K. E. Stephan et al., 2008; K. E. Stephan, Weiskopf,  
9 Drysdale, Robinson, & Friston, 2007).

10 DCM for fMRI is characterized by two layers: first, a set of ordinary differential equations  
11 that model the dynamics of interacting neuronal states  $x$  and local hemodynamic states  $h$ .  
12 Second, the hemodynamic states enter a static nonlinear observation equation that relates  
13 venous blood volume and deoxyhemoglobin content to measured BOLD signal changes.  
14 In the following, we discuss only the most relevant equations, in order to convey an  
15 understanding of the type of problem that model inversion in DCM faces.

16 The general form of the dynamics of the neuronal layer is

$$17 \quad \frac{dx}{dt} = f(x, u, \theta_c) \quad (1)$$

18 where  $x = (x_1, \dots, x_N)$  describes the neuronal states of  $N$  regions,  $u = (u_1, \dots, u_M)$   
19 represents the time series of  $M$  experimental manipulations or inputs, and  $\theta_c$  are the  
20 connectivity parameters that determine the neuronal dynamics. Using a second order  
21 Taylor expansion (Stephan et al., 2008), the dynamics  $f$  can be approximated as:

$$22 \quad \frac{dx}{dt} = Ax + \sum_{j=1}^M u_j B_j x + Cu + \sum_{i=1}^N x_i D_i x. \quad (2)$$

23 The connectivity parameters  $\theta_c$  can be divided into four subsets: The  $N \times N$  matrix  $A$   
24 describes endogenous connectivity strengths between regions. The set of  $N \times N$  matrices  
25  $B = \{B_1, \dots, B_M\}$  encodes modulatory effects of inputs on connections between regions.  
26 The  $N \times M$  matrix  $C$  describes the direct effects of driving inputs on regions. Finally, the  
27  $N \times N$  matrices  $D = \{D_1, \dots, D_N\}$  denote second-order interactions between two regions

28 that affect a third one. Linear DCMs use  $A$  and  $C$  matrices, bilinear DCMs contain at least  
 29 one non-zero  $B$  matrix, and nonlinear DCMs contain at least one non-zero  $D$  matrix.  
 30 Together  $\theta_c = \{A, B, C, D\}$  fully describe the dynamics of the neuronal layer.

31 The hemodynamic model of DCM originates from the Balloon model proposed by Buxton,  
 32 Wong, and Frank (1998) and extended by Friston (2002) and K. E. Stephan et al. (2007).  
 33 In brief, it describes how changes in neuronal states locally alter cerebral blood flow,  
 34 which, in turn, affects venous blood volume and deoxyhemoglobin content. The model  
 35 consists of a cascade of deterministic differential equations:

$$36 \quad \frac{dh}{dt} = l(h, x, \theta_h), \quad (3)$$

37 where  $h = (h_1, \dots, h_N)$  denotes hemodynamic states in each of  $N$  regions. Detailed  
 38 equations and the meaning of the hemodynamic parameters  $\theta_h$  can be found in K. E.  
 39 Stephan et al. (2007). It is worth noting that the hemodynamic equations are nonlinear  
 40 and that the original implementation in SPM uses a local (bi)linear approximation  
 41 (Friston et al., 2003).

42 Finally, hemodynamic states enter a static nonlinear observation equation  $g$  with  
 43 parameters  $\theta_g$  that models the BOLD signal  $y$ :

$$44 \quad y = g(h, \theta_g) + X_0\beta + \varepsilon \quad (4)$$

45 The term  $X_0$  is a matrix of confound regressors that accounts for constant terms and low  
 46 frequency fluctuations. The Gaussian observation noise  $\varepsilon$  is characterized by the  
 47 covariance matrix  $\Pi_\varepsilon^{-1}$ :

$$48 \quad \varepsilon \sim N(0, \Pi_\varepsilon^{-1}). \quad (5)$$

49 The precision matrix  $\Pi_\varepsilon$  is represented as a linear combination  $\Pi_\varepsilon = \sum_r \exp(\lambda_r) Q_r$ . The  
 50 precision components  $Q_r$  serve to account for temporal autocorrelation and regional  
 51 differences in noise variance (Friston et al., 2003). Here, we assume that the time series  
 52 have been whitened and therefore only account for region-specific variances. In this case,  
 53 each  $Q_r$  is a diagonal matrix with diagonal elements belonging to region  $r$  set to 1, and 0  
 54 elsewhere.

55 To complete the generative model, the prior distribution of the parameters  $\theta =$   
 56  $(\theta_c, \theta_h, \theta_g, \beta)$  and hyperparameters  $\Lambda$  needs to be specified. For the results presented in  
 57 this paper, the priors have been largely matched to SPM8 release 5236

58 (<http://www.fil.ion.ucl.ac.uk/spm>), except for the scaling of the prior variance of the  
59 coefficients of the confound matrix  $X_0$ , which was adapted to the scaling of the data as  
60 explained in S8. All parameters' prior distributions are Gaussian, and when positivity  
61 needs to be enforced, an adequate transformation function is used.

62

## 63 S2 Bayesian model comparison and selection

64 In this section, we provide a summary of Bayesian model selection (BMS). Detailed  
65 treatments can be found in standard textbooks, such as MacKay (2004).

66 Bayesian inference involves the specification of a probabilistic or generative model  $m$   
67 with data  $y$  and parameters  $\theta$ . The model has two components: the prior density over  $\theta$ ,  
68  $p(\theta|m)$ , and the likelihood function  $p(y|\theta, m)$ . These are combined to form the posterior  
69 distribution using Bayes' theorem. Conditioning on a given model  $m$ , the posterior  
70 distribution is:

$$71 \quad p(\theta|y, m) = \frac{p(y|\theta, m)p(\theta|m)}{p(y|m)}, \quad (6)$$

$$72 \quad p(y|m) = \int p(y|\theta, m)p(\theta|m)d\theta. \quad (7)$$

73 The normalization constant in the denominator,  $p(y|m)$ , is known as the marginal  
74 likelihood or model evidence and corresponds to the likelihood of the data after  
75 marginalizing out the parameters of the model.

76 In practice, given the monotonicity of the logarithmic function, either the evidence or its  
77 logarithm can be used to score a set of candidate models  $m_1, \dots, m_n$  (Bayesian model  
78 comparison) and to identify the best model within the model space studied (Bayesian  
79 model selection; BMS). One common metric for assessing the relative goodness of two  
80 models is the Bayes factor (Kass & Raftery, 1995):

$$81 \quad B_{i,j} = \frac{p(y | m_i)}{p(y | m_j)}. \quad (8)$$

82 or, equivalently, the exponential of the difference in LME of two models.

83 BMS has gained an important role in neuroimaging, not only for DCM but also in other  
84 contexts requiring model comparison, such as EEG source reconstruction (Henson,  
85 Mattout, Phillips, & Friston, 2009; Wipf & Nagarajan, 2009), or computational

86 neuroimaging (Friston & Dolan, 2010; Klaas E. Stephan, Iglesias, Heinzle, & Diaconescu,  
87 2015; K. E. Stephan et al., 2017). Group-level BMS techniques exist which account for  
88 individual heterogeneity by treating the model as a random variable in the population  
89 (Friston et al., 2016; Rigoux, Stephan, Friston, & Daunizeau, 2014; K. E. Stephan, Penny,  
90 Daunizeau, Moran, & Friston, 2009). Finally, Bayesian model averaging allows one to  
91 compute an average posterior over models (Penny et al., 2010; Trujillo-Barreto, Aubert-  
92 Vázquez, & Valdés-Sosa, 2004), weighted by the posterior probability of each model.  
93 Critically, these approaches rely on an accurate estimate of each model's evidence.

94 As mentioned above, except for some special cases, the model evidence cannot be  
95 determined analytically, and one typically has to resort to approximations. One  
96 computationally efficient option is VB {for textbook treatments, see \Koller, 2009  
97 #413;MacKay, 2004 #35}, which provides a lower bound of the LME. An alternative,  
98 which we explore in detail here, is MCMC sampling. This family of methods is  
99 characterized by simulating a Markov process whose stationary distribution corresponds  
100 to the posterior distribution  $p(\theta|y, m)$  (for a textbook reference, see Robert & Casella,  
101 2010).

102

### 103 S3 A primer on Markov chain Monte Carlo

104 In this section, we provide a short introduction to Markov chain Monte Carlo (MCMC).  
105 Thermodynamic integration (TI) requires obtaining samples from a series of power  
106 posterior distributions  $p_i(\theta|y, m) \propto p(y|\theta, m)^{\beta_i} p(\theta|m)$ , with  $0 = \beta_0 < \beta_1 \dots < \beta_N = 1$ .  
107 An efficient way to achieve this is to use independent Markov chain Monte Carlo (MCMC)  
108 samplers (one for each of the  $\beta_i$ ) to generate samples from the power posteriors.

109 MCMC is a powerful technique that can be used to generate samples from any arbitrary  
110 target probability distribution  $p(x)$ , as long as  $p(x)$  can be evaluated for any given  
111 argument  $x$ , up to a multiplicative constant  $c$ .  $c$  can be unknown, but has to be constant,  
112 i.e. cannot depend on  $x$ . To this end, the MCMC sampler generates a chain of samples  
113 where each sample depends on the previous sample in the chain, but collectively, the set  
114 of all samples in the chain are distributed according to the target distribution  $p(x)$ . To  
115 guarantee the latter point, the samples in the chain are generated sequentially according  
116 to the following procedure: Let  $x_t$  be the last sample currently in the chain, generate a so-  
117 called proposal  $x'$  via a proposal distribution  $q(x'|x_t)$ . The simplest way to do this is by

118 adding zero-mean Gaussian noise to  $x_t$ . Then calculate the so-called Metropolis-Hastings  
119 acceptance rate  $a$ , given by:

$$120 \quad a = \min\left(1, \frac{p(x')q(x_t|x')}{p(x_t)q(x'|x_t)}\right).$$

121 Finally, draw a random number  $u$  that is uniformly distributed between 0 and 1. If  $u < a$ ,  
122 the proposal is accepted and appended to the end of the chain ( $x_{t+1} = x'$ ), otherwise the  
123 proposal is rejected and the last sample is repeated ( $x_{t+1} = x_t$ ).

124 Following these steps, it is guaranteed that in the limit of an infinitely long chain, the  
125 elements of the chain represent samples from the target distribution, irrespective of the  
126 value of the first sample in the chain. More detailed treatments of MCMC can be found in  
127 standard textbooks (Brooks, Gelman, Jones, & Meng, 2011). In practice, the fact that MCMC  
128 algorithm can only run for a finite time needs to be taken into account. In this context, it  
129 is necessary to (1) account for the starting position of the chain and (2) monitor the  
130 convergence of the algorithm, i.e. to determine if the MCMC algorithm has already run for  
131 long enough such that the elements of the chain can be regarded as approximately  
132 representing samples from the desired target distribution.

133 The first problem is typically dealt with by discarding a number of samples at the  
134 beginning of the chain (typically the first half). The discarded part of the chain is generally  
135 referred to as burn-in period.

136 For the second problem, several techniques have been developed to assess the  
137 convergence of a MCMC sampler. One popular method, which is used throughout this  
138 paper, is the Gelman-Rubin's potential scale reduction factor  $\hat{R}$  (Gelman & Rubin, 1992).  
139 This method tests parameter-wise convergence by comparing the variance of segments  
140 of the chains. A  $\hat{R}$  statistic below 1.1 is a commonly accepted criterion for convergence. To  
141 compute this score, the samples of the log likelihood of the first (after the burn-in phase)  
142 and last third section of each chain were compared.

143 Since TI already requires obtaining samples from a series of power posterior  
144 distributions, convergence of the MCMC samplers can be expedited by adopting a  
145 population MCMC approach in which chains associated with neighboring temperatures  
146 (i.e.,  $\beta_i$  and  $\beta_{i+1}$ ) are allowed to interact by means of a "swap" accept-reject (AR) step  
147 (McDowell, Dyckman, Austin, & Clementz, 2008; Swendsen & Wang, 1986). In brief,  
148 population MCMC defines a joint product distribution

149 
$$\prod_{i=0}^N p(\theta_i|y, \beta_i, m) = \prod_{i=0}^N \frac{p(y|\theta_i, m)^{\beta_i} p(\theta_i|m)}{Z_i}, \quad (9)$$

150 where  $N$  is the number of distributions or chains. The goal is to obtain samples from this  
 151 distribution by two types of AR steps: First, local steps are used to sample parameters  $\theta_i$   
 152 from  $p_{\beta_i}(\theta_i|y, m)$ . Second, samples are obtained using the swapping step in which a set of  
 153 neighboring parameters  $\theta_i, \theta_{i+1}$  are randomly chosen and then exchanged between  
 154 chains with probability:

155 
$$\min(1, (p(y|\theta_{i+1}, m)^{\beta_{i+1}} p(\theta_{i+1}|m)) / ((p(y|\theta_i, m)^{\beta_{i+1}} p(\theta_i|m))))). \quad (10)$$

156 This AR step does not change the stationary distribution of any of the chains.

157 Population MCMC can be easily parallelized, with or without exploiting GPUs (Aponte et  
 158 al., 2016) as each of the chains is independent of the rest of the ensemble. Swapping steps  
 159 need to be performed serially but, assuming that the likelihood and prior functions have  
 160 been already evaluated, this method increases the efficiency of the sampling scheme while  
 161 only inducing negligible computational costs (for example, Aponte et al., 2016;  
 162 Calderhead & Girolami, 2009). Intuitively, the increase in efficiency is achieved by  
 163 exploring the sampling space in a way comparable to simulated annealing, i.e., allowing  
 164 some of the chains to explore the parameter space more freely by relaxing the likelihood  
 165 function.

166

## 167 S4 Derivation of the equilibrium distribution for the ideal gas example

168 In this section, we present the derivation of the equilibrium distribution for the ideal gas  
 169 example in the main text. As outlined in the main text, the equilibrium distribution is  
 170 attained as the maximum entropy solution, which can be found using a variational  
 171 Lagrangian with two constraints represented by the Lagrange multipliers  $\lambda_1$  and  $\lambda_2$  (see  
 172 Blundell & Blundell, 2009; Jaynes, 1957):

173 
$$\frac{\delta}{\delta q} \left[ -k_B \int q(\theta) \ln q(\theta) d\theta - \lambda_1 \left( \int q(\theta) \phi(\theta) d\theta - U \right) - \lambda_2 \left( \int q(\theta) d\theta - 1 \right) \right] = 0. \quad (11)$$

174 Noting that

175 
$$-\frac{\delta}{\delta q} k_B \int q(\theta) \ln q(\theta) d\theta = k_B (-1 - \ln q(\theta)) \quad (12)$$

176 
$$-\frac{\delta}{\delta q} \lambda_1 \left( \int q(\theta) \phi(\theta) d\theta - U \right) = -\lambda_1 \phi(\theta), \quad (13)$$

177 
$$-\frac{\delta}{\delta q} \lambda_2 \left( \int q(\theta) d\theta - 1 \right) = -\lambda_2, \quad (14)$$

178 the Lagrangian yields

179 
$$k_B \ln q(\theta) = -\lambda_1 \phi(\theta) - \lambda_2 - k_B, \quad (15)$$

180 
$$q(\theta) = \frac{1}{\exp\left(\frac{\lambda_2}{k_B} + 1\right)} \exp\left(-\frac{\lambda_1}{k_B} \phi(\theta)\right). \quad (16)$$

181 The term  $\lambda_1$  constitutes the definition of inverse temperature in statistical physics  
 182 (Blundell & Blundell, 2009; Jaynes, 1957):

183 
$$\frac{1}{T} \stackrel{\text{def}}{=} \lambda_1. \quad (17)$$

184 The term  $\frac{\lambda_1}{k_B} = \frac{1}{k_B T}$  is commonly represented by the symbol  $\beta$ . In order to derive the  
 185 second constant  $\lambda_2$ , we write:

186 
$$q(\theta) = \frac{1}{Z} \exp\left(-\frac{\phi(\theta)}{k_B T}\right), \quad (18)$$

187 where  $Z$  is referred to as the partition function of the system:

188 
$$Z \stackrel{\text{def}}{=} \int \exp\left(-\frac{\phi(\theta)}{k_B T}\right) d\theta. \quad (19)$$

189 Hence, the term  $\exp\left(\frac{\lambda_2}{k_B} + 1\right)$  is the normalization constant of  $q(\theta)$ , and thus  $\lambda_2 =$   
 190  $k_B(\ln Z - 1)$ .

191

192

## 193 S5 Variational Bayes under the Laplace approximation for DCM

194 This section introduces the variational Bayes under the Laplace (VBL) approximation for  
 195 inverting dynamic causal models. For an in-depth discussion see (Friston, Mattout,  
 196 Trujillo-Barreto, Ashburner, & Penny, 2007).

197 Commonly, in order to maximize  $-F_{VB}$ , a mean field approximation of  $q$  is used. In other  
 198 words, the distribution  $q$  is assumed to factorize into different sets of parameters, each of  
 199 which defines a more tractable optimization problem. In the case of DCM,  $q$  is assumed to  
 200 have the form:

$$201 \quad q(\Theta, \Lambda) = q(\Theta)q(\Lambda), \quad (20)$$

202 i.e., the parameters  $\Theta = (\theta_c, \theta_h, \theta_g, \beta)$  and the hyperparameters  $\Lambda$  are assumed to be  
 203 conditionally independent. The functional  $-F_{VB}$  can be optimized iteratively with respect  
 204 to  $\Theta$  and  $\Lambda$  converging to a maximum  $-F_{VB} \leq \ln p(y|m)$  (Koller, 2009). This rests on  
 205 maximizing the variational energies:

$$206 \quad \ln q(\Theta) = \int q(\Lambda) \ln p(y, \Theta, \Lambda) d\Lambda + c_\Theta, \quad (21)$$

$$207 \quad \ln q(\Lambda) = \int q(\Theta) \ln p(y, \Theta, \Lambda) d\Theta + c_\Lambda. \quad (22)$$

208 where  $c_\Theta$  and  $c_\Lambda$  are constants with respect to  $\Theta$  and  $\Lambda$ , respectively. In DCM, it is typically  
 209 assumed that all terms are Gaussian (but see Raman, Deserno, Schlagenhaut, and Stephan  
 210 (2016) and Yao et al. (2018) who used conjugate priors for the noise terms).

211 Despite the mean field approximation, the integrals in Eq. 22 and 21 and cannot be solved  
 212 analytically because of the nonlinearities of the forward model (Eq. 4). This problem is  
 213 circumvented by approximating the log of the unnormalized posterior with a second  
 214 order Taylor expansion on a local maximum (or equivalently, the unnormalized posterior  
 215 is assumed to be Gaussian) and optimizing the objective function  $\ln p(y, \Theta, \Lambda)$  through  
 216 gradient ascent (but see Lomakina et al. (2015) for an alternative based on Gaussian  
 217 processes). This approach is called the Laplace approximation (Friston et al., 2007) and  
 218 underlies other methods such as BIC (Schwarz, 1978) or when the normalization constant  
 219 of an approximate, tractable posterior is directly used (Kass & Raftery, 1995). As a  
 220 consequence of this approximation, the variational free energy is no longer guaranteed to  
 221 represent a lower bound on the log evidence (Wipf & Nagarajan, 2009). **A detailed**  
 222 **treatment of VBL can be found in Friston et al. (2007). In section S9, we present a**  
 223 **simplified version of the derivation of the VBL estimate of the free energy and an**  
 224 **explicit expression for the accuracy term.**



225 The VBL algorithm used here was the implementation available in the software package  
 226 SPM8 (release 5236), which employs a gradient ascent scheme to optimize the marginal  
 227 distributions  $q(\theta)$  and  $q(\Lambda)$  (Friston et al., 2007).

228

## 229 S6 Conventional sampling-based estimation of model evidence

230 In this section, we provide summaries to two popular sampling-based estimators for the  
 231 log model evidence: the prior arithmetic mean estimator (AME) and the posterior  
 232 harmonic mean estimator (HME).

### 233 **Prior arithmetic mean estimator (AME)**

234 Importance sampling is a Monte Carlo method for approximating the expected value of a  
 235 random variable  $h(X)$  under the density  $p$  by means of an auxiliary density function  $w(X)$ ,  
 236 which is required to be absolutely continuous with respect to  $p$  (Robert & Casella, 2010;  
 237 p. 92, Def. 3.9), or less formally, the auxiliary density  $w$  should share the same support as  
 238  $p$  to avoid zeros in the denominator:

$$239 \quad \int h(x)p(x)dx = \int \frac{h(x)p(x)w(x)}{w(x)} dx. \quad (23)$$

240 From the strong law of large numbers, if this expected value exists, the process

$$241 \quad \lim_{K \rightarrow \infty} \frac{1}{K} \sum_{k=1}^K h(x_k) \frac{p(x_k)}{w(x_k)} \quad (24)$$

242 converges almost surely to Eq. 9 when the samples  $x_1, \dots, x_K$  have been drawn from the  
 243 auxiliary distribution  $w$ .

244 In order to approximate the model evidence by importance sampling, the simplest choice  
 245 of the auxiliary density is the prior distribution,  $w = p(\theta | m)$ . This results in the prior  
 246 arithmetic mean estimator (AME):

$$247 \quad p(y|m) = \int p(y|\theta, m)p(\theta|m)d\theta = \int p(y|\theta, m)p(\theta|m) \frac{p(\theta|m)}{p(\theta|m)} d\theta, \quad (25)$$

$$248 \quad p_{AME} = \frac{1}{K} \sum_{k=1}^K p(y|\theta_k, m). \quad (26)$$

249 where samples  $\theta_k$  have been obtained from the prior distribution  $p(\theta|m)$ . Because  
 250 samples of the likelihood  $p(y|\theta, m)$  can greatly exceed the range of double precision

251 floating point numbers, it is necessary to normalize the likelihood function in log space.  
 252 This can be achieved with the following formula:

$$253 \quad \ln p_{AME} = \ln \alpha - \ln K + \ln \sum_{i=1}^K \exp[\ln p(y|\theta_i, m) - \ln \alpha], \quad (27)$$

254 where  $\alpha > 0$  is an arbitrary constant. In all analyses reported here,  $\alpha$  was set to  
 255  $\max_k p(y|\theta_k, m)$ .

256 A serious shortcoming of AME is that in the great majority of situations most samples  
 257 drawn from the prior have very low likelihood. Therefore, an extremely large number of  
 258 samples is required to ensure that high likelihood regions of the parameter space are  
 259 taken into account by the estimator; otherwise, the estimator suffers from high variance  
 260 (Vyshemirsky & Girolami, 2008).

### 261 **Posterior harmonic mean estimator (HME)**

262 The second choice for the auxiliary density is the posterior distribution, which results in  
 263 the posterior harmonic mean estimator (HME). This estimator has received divergent  
 264 appraisals in the literature as a method for computing the LME (for example, Kass &  
 265 Raftery, 1995; Wolpert & Schmidler, 2012). Re-expressing the model evidence, the HME  
 266 can be derived as follows:

$$267 \quad \frac{1}{p(y|m)} = \int \frac{p(\theta|m)}{p(y|m)} d\theta,$$

$$268 \quad = \int \frac{p(y|\theta, m)p(\theta|m)}{p(y|\theta, m)p(y|m)} d\theta,$$

$$269 \quad = \int \frac{p(\theta|y, m)}{p(y|\theta, m)} d\theta \quad (28)$$

$$270 \quad p_{HME} = \left( \frac{1}{K} \sum_{i=1}^K \frac{1}{p(y|\theta_i, m)} \right)^{-1}. \quad (29)$$

271 Here, samples  $\theta_i$  are drawn from the posterior distribution  $p(\theta|y, m)$ .

272 In order to avoid numerical instabilities, it is again necessary to normalize in log space,  
 273 using the formula

$$274 \quad \ln p_{HME} = \ln K + \ln \alpha - \ln \sum_{i=1}^K \exp[-\ln p(y|\theta_i, m) + \ln \alpha]. \quad (30)$$

275 Here,  $\ln \alpha$  has been chosen to be  $\max_i -\ln p(y|\theta_i, m)$ .

276 A disadvantage of HME is that its variance might be infinite when the likelihood function  
277 is not heavy-tailed (Raftery, Newton, Satagopan, & Krivitsky, 2007), which has serious  
278 consequences for the convergence rate of a wide variety of models (Wolpert & Schmidler,  
279 2012). A second problem is that the samples used for HME are obtained from the posterior  
280 distribution only. This leads to the opposite behavior as for AME: because the contribution  
281 of the prior to the LME might not be appropriately accounted for, the HME tends to  
282 overestimate the model evidence, a behavior that can be difficult to diagnose (Lartillot &  
283 Philippe, 2006). Several improvements of the HME have been proposed to account for this  
284 shortcoming (for example, Raftery et al., 2007).

285

## 286 **Implementation**

287 Since TI requires samples from both the prior and the posterior distribution, which  
288 correspond to the power posteriors with  $\beta = 0$  and  $\beta = 1$ , respectively, the samples  
289 acquired for TI can be used for computing the other sampling-based estimators, AME and  
290 HME. In our comparisons throughout this paper, we have used this technique to ensure  
291 that any observed differences between estimators are not simply due to differences in the  
292 implementation of the samplers.

293

## 294 **S7 Connectivity parameters of the synthetic models**

295 The connectivity parameters of the synthetic models used here are shown below.

296 *Model 1*

297 Model one did not include any bilinear or non-linear terms.

298 
$$A = \begin{pmatrix} -0.5 & 0 & 0 \\ 0 & -0.5 & 0 \\ 0 & 0 & -0.5 \end{pmatrix}, \quad C = \begin{pmatrix} 1 & 0 \\ 0 & 1 \\ 1 & 1 \end{pmatrix}.$$

299 *Model 2*

300 Models 2 to 5 used the same A and C matrices. In addition, models 2 to 4 included one  
301 bilinear term (B matrices), and model 5 included a nonlinear term (D matrices).

302 
$$A = \begin{pmatrix} -0.5 & 0 & -0.25 \\ 0 & -0.5 & -0.25 \\ 0.5 & 0.5 & -0.5 \end{pmatrix}, \quad C = \begin{pmatrix} 1 & 0 \\ 0 & 1 \\ 0 & 0 \end{pmatrix},$$

303 
$$B_1 = \begin{pmatrix} 0 & 0 & 0 \\ 0 & 0 & 0 \\ 0 & 3 & 0 \end{pmatrix}, \quad B_2 = \begin{pmatrix} 0 & 0 & 0 \\ 0 & 0 & 0 \\ 0 & 0 & 0 \end{pmatrix}.$$

304 *Model 3*

305 Because model 3 shared the same A and C matrix with model 2, we only display the B  
306 matrices.

307 
$$B_1 = \begin{pmatrix} 0 & 0 & 0 \\ 0 & 0 & 0 \\ 0 & 0 & 0 \end{pmatrix}, \quad B_2 = \begin{pmatrix} 0 & 0 & 0 \\ 0 & 0 & 0 \\ 3 & 0 & 0 \end{pmatrix}.$$

308 *Model 4*

309 Again, only the B matrices differed between models 2, 3, and 4.

310 
$$B_1 = \begin{pmatrix} 0 & 0 & 0 \\ 0 & 0 & 0 \\ 0 & 0 & 0 \end{pmatrix}, \quad B_2 = \begin{pmatrix} 0 & 0 & 0 \\ 0 & 0 & 0 \\ 0 & 0 & -2 \end{pmatrix}.$$

311 *Model 5*

312 Model 5 included no bilinear term but included one non-linear term.

313 
$$D_1 = \begin{pmatrix} 0 & 0 & 0 \\ 0 & 0 & 0 \\ 0 & 0 & 0 \end{pmatrix}, \quad D_2 = \begin{pmatrix} 0 & 0 & 0 \\ 0 & 0 & 0 \\ 1 & 0 & 0 \end{pmatrix}, \quad D_3 = \begin{pmatrix} 0 & 0 & 0 \\ 0 & 0 & 0 \\ 0 & 0 & 0 \end{pmatrix}.$$

314 The exact data structures can be downloaded from the ETH research collection (ETH  
315 Zurich, 2020).

316

## 317 S8 Scaling of BOLD signals

318 In the SPM version used here (5236), BOLD signals  $y$  are rescaled with respect to their  $\ell_\infty$   
319 norm, such that

320 
$$\|y\|_\infty = 4. \tag{A.1}$$

321 In DCM, the observation equation (see Eq. 4) can be written as

322 
$$y = g(h, \theta_g) + X_0\beta + \varepsilon \quad (\text{A. 2})$$

323 where  $X_0$  represents confounding factors. This matrix usually consists of cosine functions  
 324 that account for baseline effects and low frequency components and can be imagined as  
 325 implementing a model of structured noise (scanner-related fluctuations in signal  
 326 intensity) that is distinct from the model's residuals. We assume  $N$  observations such that  
 327 data from a region is  $y[t]$ ,  $t = 0, \dots, N - 1$ , and the components of  $X_0 = [x_K, \dots, x_{M-1}]^T$ ,  
 328  $K > 0$  are

329 
$$x_k[t] = \cos\left(\frac{2\pi kt}{N}\right). \quad (\text{A. 3})$$

330 In this case,  $X_0^T X_0$  is a diagonal matrix as all base functions are orthogonal. The diagonal  
 331 elements are given by

332 
$$\sum_{n=0}^{N-1} \cos\left(\frac{2\pi\omega n}{N}\right)^2 = \frac{N}{2}, \quad (\text{A. 4})$$

333 Thus,

334 
$$X_0^T X_0 = \frac{N}{2} I. \quad (\text{A. 5})$$

335 The posterior variance of the regressors conditioned on the predictions from DCM, the  
 336 variance of the error  $\sigma_c^2$ , and the prior variance  $\sigma_0$ , is

337 
$$(\sigma_c^{-2} X^T X + \sigma_0^{-2} I)^{-1} = \left(\frac{\sigma_c^{-2} N}{2} I + \sigma_0^{-2} I\right)^{-1}, \quad (\text{A. 6})$$

338

339 
$$= \left(\frac{N}{2\sigma_c^2} + \frac{1}{\sigma_0^2}\right)^{-1} I. \quad (\text{A. 7})$$

340 To derive the prior variance of the signal predicted by  $X_0\beta$ , we note that for the predicted  
 341 signal  $y$ :

342 
$$E[y[t]^2] = E\left[\left(\sum_{\omega=K}^{M-1} \beta_\omega \cos\frac{2\pi t\omega}{N}\right)^2\right], \quad (\text{A. 8})$$

343 
$$= E\left[\sum_{\omega,k=K}^{M-1} \beta_\omega \beta_k \cos\frac{2\pi t\omega}{N} \cos\frac{2\pi tk}{N}\right]. \quad (\text{A. 9})$$

344 Because the coefficients are assumed to be uncorrelated and to have zero mean, it follows  
 345 that

$$346 \quad = \sum_{\omega=K}^{M-1} \text{Var}(\beta_{\omega}) \cos^2\left(\frac{2\pi t\omega}{N}\right), \quad (\text{A. 10})$$

$$347 \quad = \sigma_0^2 \left( \sum_{\omega=0}^{M-1} \cos^2\left(\frac{2\pi t\omega}{N}\right) - \sum_{\omega=0}^{K-1} \cos^2\left(\frac{2\pi t\omega}{N}\right) \right). \quad (\text{A. 11})$$

348 Assuming that  $2Mt/N$  is an integer, it follows that

$$349 \quad = \sigma_0^2 \left( \frac{M}{2} - \sum_{\omega=0}^{K-1} \cos^2\left(\frac{2\pi t\omega}{N}\right) \right). \quad (\text{A. 12})$$

350 It follows that

$$351 \quad \frac{\sigma_0^2(M-K)}{2} \leq E[y[t]^2] = \text{Var}(y[t]) \leq \frac{\sigma_0^2 M}{2}. \quad (\text{A. 13})$$

352 This constitutes an approximation to the prior variance of the signal. Although in the SPM  
 353 implementation of DCM used here,  $\sigma_0^2$  is set to  $10^8$ , here we use a more pragmatic value  
 354  $\sigma_0 = ||y||_{\infty} = 4$ . From Eq. A.12, it can be seen that this constitutes a more conservative  
 355 prior variance than the SPM implementation, but still liberal enough to a priori easily  
 356 account for the totality of the variance in the data.

357

## 358 S9 Derivation of variational negative free energy under the Laplace 359 approximation

360 The expression for the variational negative free energy can be derived by noting that Eq.  
 361 34 in the main text can be written as an energy term plus an entropy term

$$362 \quad -F_{VB} = E[\ln p(y, \theta)]_{q(\theta)} - E[\ln q(\theta)]_{q(\theta)}. \quad (\text{A. 14})$$

363 For simplicity, in the rest of this section, we collapse parameters  $\theta$  and hyperparameters  
 364  $\Lambda$  into a  $d$ -dimensional vector  $\theta$ , assuming that a maximum has been obtained. Also, we  
 365 assume that all densities are conditioned on model  $m$ , and make this assumption implicit.  
 366 Moreover, we assume that the prior distribution of parameters  $\theta$  is a Gaussian  
 367 distribution centered at  $\theta_0$  with covariance  $\Pi_0^{-1}$ .

368 According to the Laplace approximation,  $q(\theta)$  is a Gaussian distribution with mean  $\theta^* =$   
 369  $\arg \max_{\theta} p(y, \theta)$  and variance

$$370 \quad \Pi = -\frac{\partial^2 \ln p(y, \theta)}{\partial \theta^2} = \Pi_0 - \frac{\partial^2 \ln p(y|\theta)}{\partial \theta^2}. \quad (\text{A. 15})$$

371 We denote the negative Hessian of the likelihood or observed Fisher information in the  
 372 following as  $\Pi_L$ .

373 The energy term in Eq. A. 14 is approximated using the Laplace method, which yields

$$374 \quad E[\ln p(y, \theta)]_{q(\theta)} \approx \ln p(y, \theta^*) - \frac{1}{2} E[(\theta^* - \theta)' \Pi (\theta^* - \theta)]_{q(\theta)}, \quad (\text{A. 16})$$

$$375 \quad = \ln p(y, \theta^*) - \frac{1}{2} \text{tr}(\Pi E[(\theta^* - \theta)(\theta^* - \theta)']_{q(\theta)}), \quad (\text{A. 17})$$

$$376 \quad = \ln p(y, \theta^*) - \frac{1}{2} \text{tr}(\Pi \Pi^{-1}) = \ln p(y, \theta^*) - \frac{1}{2} d. \quad (\text{A. 18})$$

377 where  $\text{tr}$  denotes the trace operator.

378 The last term in Eq. A. 14 is the entropy of a Gaussian distribution, which is given by:

$$379 \quad -E[\ln q(\theta)]_{q(\theta)} = \frac{1}{2} (d \ln 2\pi + d - \ln |\Pi|). \quad (\text{A. 19})$$

380 where  $\Pi$  is the precision of  $q$ .

381 Plugging Eqs. A. 18 and A. 19 into Eq. A. 14, the variational free energy is given by

$$382 \quad -F_{VB} = \ln p(y, \theta^*) + \frac{1}{2} (d \ln 2\pi - \ln |\Pi|). \quad (\text{A. 20})$$

383 The first term on the right of Eq. A. 20 can be expanded to obtain the full expression:

$$384 \quad \ln p(y, \theta^*) = \ln p(y|\theta^*) + \ln p(\theta^*), \quad (\text{A. 21})$$

$$385 \quad = \ln p(y|\theta^*) - \frac{1}{2} d \ln 2\pi + \frac{1}{2} \ln |\Pi_0| - \frac{1}{2} (\theta^* - \theta_0)' \Pi_0 (\theta^* - \theta_0). \quad (\text{A. 22})$$

386 where  $\theta_0$  and  $\Pi_0$  are the mean and precision of the prior density, respectively. By  
 387 inserting Eq. **Error! Reference source not found.** into Eq. A. 20, the scheme proposed  
 388 by Friston et al. (2007) can be written as:

$$389 \quad -F_{VB} = \ln p(y|\theta^*) + \frac{1}{2} \ln \frac{|\Pi_0|}{|\Pi|} - \frac{1}{2} (\theta^* - \theta_0)' \Pi_0 (\theta^* - \theta_0). \quad (\text{A. 23})$$

390 Although VBL is typically orders of magnitude faster than MCMC sampling, it exhibits  
 391 several limitations: it is susceptible to (i) local extrema, (ii) violations of the distributional  
 392 assumptions imposed on the posterior, (iii) violations of the conditional independence  
 393 assumptions of the mean field approximation (see Daunizeau, David, & Stephan, 2011 for  
 394 discussion), and (iv) it is only defined when the Hessian in Eq. A. 15 is not singular.

395 Returning to our theme of connecting TI to VBL, one can write the variational negative  
 396 free energy in terms of an approximate accuracy and complexity term (Eq. **Error!**  
 397 **Reference source not found.**). One observes that the accuracy term can be computed as

$$398 \quad -F_{VB} + KL(q(\theta)||p(\theta)) = A_{VB}. \quad (\text{A. 24})$$

399 Given a Gaussian prior and posterior, the KL divergence has the following analytical form:

$$400 \quad KL(q(\theta)||p(\theta)) = \frac{1}{2} \left[ \ln \frac{|\Pi|}{|\Pi_0|} + \text{tr}(\Pi_0 \Pi^{-1}) - d + (\theta^* - \theta_0)' \Pi_0 (\theta^* - \theta_0) \right]. \quad (\text{A. 25})$$

401 Replacing terms, we obtain

$$402 \quad A = E[\ln p(y|\theta)]_{q(\theta)}, \quad (\text{A. 26})$$

$$403 \quad \approx A_{VB} = \ln p(y|\theta^*) + \frac{\text{tr}(\Pi_0 \Pi^{-1})}{2} - \frac{d}{2}. \quad (\text{A. 27})$$

404 A more familiar expression for the accuracy can be derived by noting that the posterior  
 405 covariance can be written as the sum of the negative Hessian of the likelihood plus the  
 406 prior covariance, such that

$$407 \quad A_{VB} = \ln p(y|\theta^*) + \frac{1}{2} \text{tr} \left( \frac{\Pi_0 + \Pi_L - \Pi_L}{\Pi_0 + \Pi_L} \right) - \frac{d}{2}, \quad (\text{A. 28})$$

$$408 \quad = \ln p(y|\theta^*) - \frac{1}{2} \text{tr} \left( \frac{\Pi_L}{\Pi_0 + \Pi_L} \right), \quad (\text{A. 29})$$

$$409 \quad \mathbb{p} = \text{tr} \left( \frac{\Pi_L}{\Pi_0 + \Pi_L} \right). \quad (\text{A. 30})$$

410  $\mathbb{p}$  is the effective number of parameters proposed by Moody (1991) Eq. 18 and see  
 411 Spiegelhalter, Best, Carlin, and van der Linde (2002) Eq. 15 and is commonly used for  
 412 model selection.

413



414 S10 Predicted fMRI time series for the attention to motion dataset

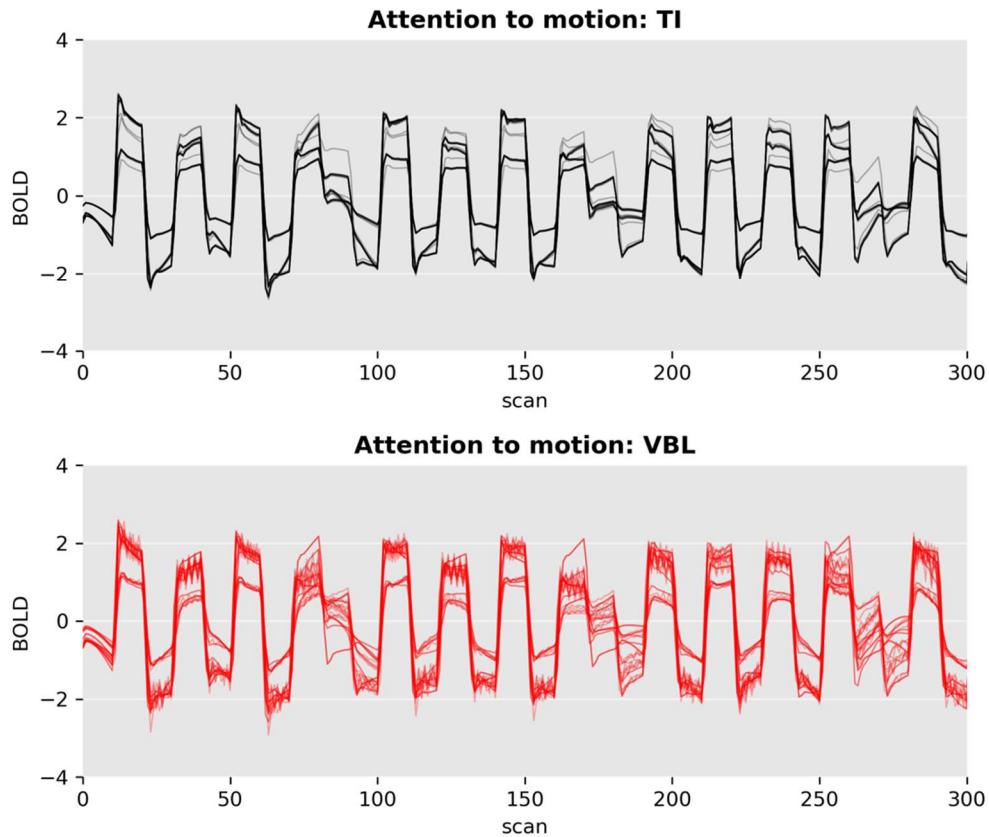

**Figure S1.** Comparison of 10 predicted BOLD signal trajectories (for the MAP estimate) of model  $m_4$  between TI and VBL for the “attention to motion” dataset from Buchel (1997). In order to obtain an unbiased impression of the variability, the predicted BOLD responses are plotted in full (i.e., including estimated confounds; compare Eq. 4). Both estimates are qualitatively similar, but VBL fits display higher variability.

415

416 S11 Final step in the derivation of the fundamental TI equation

417 Applying the chain rule of differentiation to the logarithm of a positive-valued function,  
 418 we have the following relation:

419 
$$\frac{d}{d\beta} \ln f(\beta) = \frac{1}{f(\beta)} \frac{d}{d\beta} f(\beta)$$

420 In the main text section Thermodynamic Integration and the origin of free energy, we  
 421 have shown that the log-model evidence is given by the expression (Eq. 22 main text):

422 
$$\ln p(y|m) = \int_{\beta=0}^{\beta=1} \frac{d}{d\beta} \ln \int p(y|\theta, m)^\beta p(\theta|m) d\theta d\beta$$

423 Applying the above relation with  $f(\beta) = \int p(y|\theta, m)^\beta p(\theta|m) d\theta = Z_\beta$ , we have

$$424 \quad \frac{d}{d\beta} \ln \int p(y|\theta, m)^\beta p(\theta|m) d\theta = \frac{\frac{d}{d\beta} \int p(y|\theta, m)^\beta p(\theta|m) d\theta}{\int p(y|\theta, m)^\beta p(\theta|m) d\theta}$$

$$425 \quad = \frac{1}{Z_\beta} \int \frac{d}{d\beta} p(y|\theta, m)^\beta p(\theta|m) d\theta$$

$$426 \quad = \frac{1}{Z_\beta} \int p(y|\theta, m)^\beta p(\theta|m) \ln p(y|\theta, m) d\theta$$

$$427 \quad = \int \frac{p(y|\theta, m)^\beta p(\theta|m)}{Z_\beta} \ln p(y|\theta, m) d\theta.$$

428 Note that the last line above is the integrand in Eq. 23 in the main text. Also note that in  
429 the second line above, we have exchanged the derivative with respect to  $\beta$  with the  
430 integration over  $\theta$  and in the third line, we have used the derivative of an exponential  
431 function:

$$432 \quad \frac{d}{d\beta} a^\beta = a^\beta \ln a.$$

433

## 434 References

435 Aponte, E. A., Raman, S., Sengupta, B., Penny, W., Stephan, K. E., & Heinzle, J. (2016).  
436 mpdcm: A toolbox for massively parallel dynamic causal modeling. *Journal of*  
437 *Neuroscience Methods*, 257, 7-16.  
438 doi:<http://dx.doi.org/10.1016/j.jneumeth.2015.09.009>

439 Blundell, S. J., & Blundell, K. M. (2009). *Concepts in Thermal Physics*. Oxford: Oxford  
440 University Press, Incorporated.

441 Brooks, S., Gelman, A., Jones, G., & Meng, X. L. (2011). *Handbook of Markov chain Monte*  
442 *Carlo* (S. Brooks, A. Gelman, G. Jones, & X. L. Meng Eds.). New York: Chapman & Hall.

443 Buchel, C. (1997). Modulation of connectivity in visual pathways by attention: cortical  
444 interactions evaluated with structural equation modelling and fMRI. *Cerebral*  
445 *cortex (New York, N.Y. 1991)*, 7(8), 768-778. doi:10.1093/cercor/7.8.768

446 Buxton, R. B., Wong, E. C., & Frank, L. R. (1998). Dynamics of blood flow and oxygenation  
447 changes during brain activation: The balloon model. *Magnetic Resonance in*  
448 *Medicine*, 39(6), 855-864. doi:10.1002/mrm.1910390602

449 Calderhead, B., & Girolami, M. (2009). Estimating Bayes factors via thermodynamic  
450 integration and population MCMC. *COMPUTATIONAL STATISTICS & DATA*  
451 *ANALYSIS*, 53, 4028-4045. doi:10.1016/j.csda.2009.07.025

- 452 Daunizeau, J., David, O., & Stephan, K. E. (2011). Dynamic causal modelling: A critical  
453 review of the biophysical and statistical foundations. *NeuroImage*, 58(2), 312-322.  
454 doi:<http://dx.doi.org/10.1016/j.neuroimage.2009.11.062>
- 455 ETH Zurich. (2020). ETH Research Collection. Retrieved from [https://www.research-  
456 collection.ethz.ch/bitstream/handle/20.500.11850/301664/simulation\\_dcms.zi  
457 p](https://www.research-collection.ethz.ch/bitstream/handle/20.500.11850/301664/simulation_dcms.zip)
- 458 Friston, K. J. (2002). Bayesian Estimation of Dynamical Systems: An Application to fMRI.  
459 *NeuroImage*, 16(2), 513-530. doi:<http://dx.doi.org/10.1006/nimg.2001.1044>
- 460 Friston, K. J., & Dolan, R. J. (2010). Computational and dynamic models in neuroimaging.  
461 *NeuroImage (Orlando, Fla.)*, 52(3), 752-765.  
462 doi:10.1016/j.neuroimage.2009.12.068
- 463 Friston, K. J., Harrison, L., & Penny, W. (2003). Dynamic causal modelling. *NeuroImage*,  
464 19(4), 1273-1302. doi:10.1016/S1053-8119(03)00202-7
- 465 Friston, K. J., Litvak, V., Oswal, A., Razi, A., Stephan, K. E., van Wijk, B. C. M., . . . Zeidman, P.  
466 (2016). Bayesian model reduction and empirical Bayes for group (DCM) studies.  
467 *NeuroImage*, 128(Supplement C), 413-431.  
468 doi:<https://doi.org/10.1016/j.neuroimage.2015.11.015>
- 469 Friston, K. J., Mattout, J., Trujillo-Barreto, N., Ashburner, J., & Penny, W. (2007). Variational  
470 free energy and the Laplace approximation. *NeuroImage*, 34(1), 220-234.  
471 doi:<http://dx.doi.org/10.1016/j.neuroimage.2006.08.035>
- 472 Gelman, A., & Rubin, D. B. (1992). Inference from Iterative Simulation Using Multiple  
473 Sequences. *Statistical Science*, 7(4), 457-472. doi:10.1214/ss/1177011136
- 474 Henson, R. N., Mattout, J., Phillips, C., & Friston, K. J. (2009). Selecting forward models for  
475 MEG source-reconstruction using model-evidence. *NeuroImage (Orlando, Fla.)*,  
476 46(1), 168-176. doi:10.1016/j.neuroimage.2009.01.062
- 477 Jaynes, E. T. (1957). Information Theory and Statistical Mechanics. *Physical Review*,  
478 106(4), 620-630. doi:10.1103/physrev.106.620
- 479 Kass, R. E., & Raftery, A. E. (1995). Bayes Factors. *Journal of the American Statistical  
480 Association*, 90(430), 773-795. doi:10.1080/01621459.1995.10476572
- 481 Koller, D. (2009). *Probabilistic graphical models : principles and techniques*. Cambridge,  
482 Mass: MIT Press.
- 483 Lartillot, N., & Philippe, H. (2006). Computing Bayes Factors Using Thermodynamic  
484 Integration. *Systematic Biology*, 55(2), 195-207.  
485 doi:10.1080/10635150500433722
- 486 Lomakina, E. I., Paliwal, S., Diaconescu, A. O., Brodersen, K. H., Aponte, E. A., Buhmann, J.  
487 M., & Stephan, K. E. (2015). Inversion of hierarchical Bayesian models using  
488 Gaussian processes. *NeuroImage*, 118, 133-145.  
489 doi:<http://dx.doi.org/10.1016/j.neuroimage.2015.05.084>
- 490 MacKay, D. J. C. (2004). *Information Theory, Inference, and Learning Algorithms* (Repr. with  
491 corr. ed.). Cambridge: Univ. Press.
- 492 McDowell, J. E., Dyckman, K. A., Austin, B. P., & Clementz, B. A. (2008). Neurophysiology  
493 and neuroanatomy of reflexive and volitional saccades: Evidence from studies of  
494 humans. *Brain and cognition*, 68(3), 255-270. doi:10.1016/j.bandc.2008.08.016

- 495 Moody, J. E. (1991). *The effective number of parameters: an analysis of generalization and*  
496 *regularization in nonlinear learning systems*. Paper presented at the Proceedings of  
497 the 4th International Conference on Neural Information Processing Systems,  
498 Denver, Colorado.
- 499 Penny, W., Stephan, K. E., Daunizeau, J., Rosa, M. J., Friston, K. J., Schofield, T. M., & Leff, A.  
500 P. (2010). Comparing Families of Dynamic Causal Models. *PLOS Computational*  
501 *Biology*, 6(3), e1000709. doi:10.1371/journal.pcbi.1000709
- 502 Raftery, A., Newton, M., Satagopan, J., & Krivitsky, P. (2007). Estimating the Integrated  
503 Likelihood via Posterior Simulation Using the Harmonic Mean Identity. In J. M.  
504 Bernardo, M. J. Bayarri, J. O. Berger, A. P. Dawid, D. Heckerman, A. F. M. Smith, & M.  
505 West (Eds.), *Bayesian Statistics 8* (pp. 1-45). Oxford: Oxford University Press.
- 506 Raman, S., Deserno, L., Schlagenhaut, F., & Stephan, K. E. (2016). A hierarchical model for  
507 integrating unsupervised generative embedding and empirical Bayes. *Journal of*  
508 *Neuroscience Methods*, 269, 6-20.  
509 doi:<http://dx.doi.org/10.1016/j.jneumeth.2016.04.022>
- 510 Rigoux, L., Stephan, K. E., Friston, K. J., & Daunizeau, J. (2014). Bayesian model selection  
511 for group studies — Revisited. *NeuroImage (Orlando, Fla.)*, 84, 971-985.  
512 doi:10.1016/j.neuroimage.2013.08.065
- 513 Robert, C. P., & Casella, G. (2010). *Monte Carlo statistical methods* (2nd ed. ed.): New York  
514 : Springer.
- 515 Schwarz, G. (1978). Estimating the Dimension of a Model. *The Annals of statistics*, 6(2),  
516 461-464. doi:10.1214/aos/1176344136
- 517 Spiegelhalter, D. J., Best, N. G., Carlin, B. P., & van der Linde, A. (2002). Bayesian measures  
518 of model complexity and fit. *Journal of the Royal Statistical Society. Series B,*  
519 *Statistical methodology*, 64(4), 583-639. doi:10.1111/1467-9868.00353
- 520 Stephan, Klaas E., Iglesias, S., Heinzle, J., & Diaconescu, Andreea O. (2015). Translational  
521 Perspectives for Computational Neuroimaging. *Neuron*, 87(4), 716-732.  
522 doi:<http://dx.doi.org/10.1016/j.neuron.2015.07.008>
- 523 Stephan, K. E., Kasper, L., Harrison, L. M., Daunizeau, J., den Ouden, H. E. M., Breakspear,  
524 M., & Friston, K. J. (2008). Nonlinear dynamic causal models for fMRI. *NeuroImage*,  
525 42(2), 649-662. doi:<http://dx.doi.org/10.1016/j.neuroimage.2008.04.262>
- 526 Stephan, K. E., Penny, W., Daunizeau, J., Moran, R. J., & Friston, K. J. (2009). Bayesian model  
527 selection for group studies. *NeuroImage*, 46(4), 1004-1017.  
528 doi:<http://dx.doi.org/10.1016/j.neuroimage.2009.03.025>
- 529 Stephan, K. E., Schlagenhaut, F., Huys, Q. J. M., Raman, S., Aponte, E. A., Brodersen, K. H., ...  
530 Heinz, A. (2017). Computational neuroimaging strategies for single patient  
531 predictions. *NeuroImage*, 145, Part B, 180-199.  
532 doi:<https://doi.org/10.1016/j.neuroimage.2016.06.038>
- 533 Stephan, K. E., Weiskopf, N., Drysdale, P. M., Robinson, P. A., & Friston, K. J. (2007).  
534 Comparing hemodynamic models with DCM. *NeuroImage*, 38(3), 387-401.  
535 doi:<http://dx.doi.org/10.1016/j.neuroimage.2007.07.040>
- 536 Swendsen, R. H., & Wang, J.-S. (1986). Replica Monte Carlo Simulation of Spin-Glasses.  
537 *Physical Review Letters*, 57(21), 2607-2609. doi:10.1103/physrevlett.57.2607

- 538 Trujillo-Barreto, N. J., Aubert-Vázquez, E., & Valdés-Sosa, P. A. (2004). Bayesian model  
539 averaging in EEG/MEG imaging. *NeuroImage (Orlando, Fla.)*, 21(4), 1300-1319.  
540 doi:10.1016/j.neuroimage.2003.11.008
- 541 Vyshemirsky, V., & Girolami, M. A. (2008). Bayesian ranking of biochemical system  
542 models. *Bioinformatics*, 24(6), 833-839. doi:10.1093/bioinformatics/btm607
- 543 Wipf, D., & Nagarajan, S. (2009). A unified Bayesian framework for MEG/EEG source  
544 imaging. *NeuroImage*, 44(3), 947-966.  
545 doi:<https://doi.org/10.1016/j.neuroimage.2008.02.059>
- 546 Wolpert, R. L., & Schmidler, S. C. (2012).  $\alpha$ -STABLE LIMIT LAWS FOR HARMONIC MEAN  
547 ESTIMATORS OF MARGINAL LIKELIHOODS. *Statistica Sinica*, 22(3), 1233-1251.  
548 doi:10.5705/ss.2010.221
- 549 Yao, Y., Raman, S. S., Schiek, M., Leff, A., Frässle, S., & Stephan, K. E. (2018). Variational  
550 Bayesian inversion for hierarchical unsupervised generative embedding (HUGE).  
551 *NeuroImage*, 179, 604-619.  
552 doi:<https://doi.org/10.1016/j.neuroimage.2018.06.073>
- 553
